# Supplementary material for: Connecting Air Quality with Emotional Well-Being and Neighborhood Infrastructure in a US City
Source: PubMed Central journal article supplement — Environ Health Insights. 2020 May 3;14:1178630220915488. doi: 10.1177/1178630220915488 (PMC7218333; doi:10.1177/1178630220915488), 2020-05-03
Supplement: Supplemental_material.pdf [file Supplemental_material.pdf]

List of Tables and Figures:

|    | SI Sections                                        | SI Table                                                        | SI Figure                                               |
|----|----------------------------------------------------|-----------------------------------------------------------------|---------------------------------------------------------|
| 1  | R-Line correction methodology                      | AQS site list                                                   | Minneapolis Map                                         |
| 2  | Respondent Selection Criteria and demographic info | Weekly corrections for LCS boxes                                | Low cost sensor set up                                  |
| 3  | Statistical tests                                  | Summary Statistics of neighborhood comparison to reference site | Plantower schematic from Kelly et al                    |
| 4  | Nox NAAQS exceedance                               | Study average pm2.5 and NOx                                     | Daynamica App photo                                     |
| 5  |                                                    | Concentration cutoff top10 / b90%                               | Sample Calibration Results                              |
| 6  |                                                    | Hourly regression corrections for NO <sub>x</sub> R-Line        | Neighborhood time series against reference site         |
| 7  |                                                    | NMB of R-line calibration                                       | LCS vs reference scatter plots                          |
| 8  |                                                    | Participant SES data                                            | B90% /Top 10% AQ vs EWB                                 |
| 9  |                                                    | t-table from section3                                           | Pre-calibrated R-Line results                           |
| 10 |                                                    | NOx NAAQS exceedances                                           | NOx hourly concentration factors                        |
| 11 |                                                    | Some EWB result                                                 | Comparison of R-Line pre and post cal with observations |
| 12 |                                                    |                                                                 |                                                         |

### **SI Section 1: Correcting R-Line Simulated NO<sub>x</sub> impacts**

R-Line simulation results for NO<sub>x</sub> were not in agreement with the estimates of the true mobile source impact (SI Fig. 9). The true mobile source impact is estimated as the difference between the Near-Road (monitoring) Network (NRN) hourly NO<sub>x</sub> concentration (AQS Site ID# 27-053-0962) and the average of the non-NRN NO<sub>x</sub> concentrations within 10 miles of the NRN site (NO<sub>x</sub> AQS Site IDs# 27-003-1002 & 27-037-0020 and PM<sub>2.5</sub> AQS Site IDs# 27-171-3201 & 27-139-0505 & 27-003-1002 & 27-053-0963 & 27-123-0871 & 27-123-0868). The difference between the NRN concentration and the average of the background concentrations for each hour was considered as the hourly mobile source impact at the NRN site. We could then estimate the hourly NO<sub>x</sub> spatial fields by evaluation of the initial model concentration at the NRN site with the true mobile source impacts. Each hour of the day was grouped against the corresponding mobile source impact for that hour (SI Fig. 10 for hourly comparisons), so that 24 unique comparisons could be made (SI Table 7). From here, we used 24 linear corrections to correct the corresponding hourly R-Line simulations. This calibration approach reduced maximum simulated NO<sub>x</sub> concentrations throughout the study period (SI Fig. 11), but other performance metrics, including average percent differences between the simulated mobile-source impacts and the “true” mobile-source impact determined from observations, did not show improvements, and oftentimes the performance metric was worse (SI Table 8). This is likely attributed to the correction approach which would be driven by the high-concentration simulated values by the model.

The initial horizontal dispersion coefficient,  $\sigma_z$ , a measure of the plume spread, used in this is 2 meters, the default value suggested in R-Line. This value is on the high end of mobile source  $\sigma_z$  and slight increases in  $\sigma_z$  has little influence on the output concentrations.

### **SI Section 2: Participant Selection Criteria**

Residents of randomly selected blocks (921 of the 2443 census blocks in the study neighborhoods) in the study neighborhoods were recruited to participate in the study. All homes on the

selected blocks were first post carded with a brief study description (which did not include any information of the concurrent air pollution sampling) and contact information for the research team. Once contacted, researchers explained the study in detail to the participants, individually, and those who chose to participate set an appointment with the survey team. The well-being assessments occurred in three stages, an entry survey, 7 days of episode level data collection, and an exit survey (SI Table 9 for complete demographic breakdown of the study participants). The entry and exit surveys are used to collect information on cognitive SWB, socio-demographic parameters, neighborhood perceptions, and other variables that been known to influence SWB.

**SI Section 3:** Statistical tests on regressions between air quality (observed PM<sub>2.5</sub> and mobile-source simulated NO<sub>x</sub>) and emotional well-being (EWB) indicators

Significance on the correlation coefficients between air quality (observed PM<sub>2.5</sub> and mobile-source simulated NO<sub>x</sub>) and the six EWB indicators was determined using

$$t = r * \sqrt{\frac{n - 2}{1 - r^2}}$$

Where t is the t-statistic, r is the square root of r<sup>2</sup>, and n is the number of neighborhood assessments (6).

None of the regressions were found to be statistically significant at α = 0.05 (SI Table 10).

**SI Section 4:** NAAQs Exceedances on emotional well-being (EWB)

There were four simulated hours when the mobile source NO<sub>x</sub> impact exceeded the hourly NO<sub>2</sub> NAAQs (100 ppb) in the neighborhoods when a concurrent EWB assessment existed (SI Table 11). The NAAQs exceedance in Near North resulted in higher happiness and net affect, but lower tiredness, stress, sadness, and pain (SI Table 12). This was the exact opposite of what was expected, and each of the responses was statistically significant (α=0.05). In Prospect Park, the statistically significant relationships between NO<sub>x</sub> exceedances, and EWB were negative responses with happiness and net affect. Each of the companion EWB assessments during NO<sub>x</sub> exceedance events were recorded as either

at-home or leisure recreation activity types, which may both be indoor and subject to a variety of other confounding variables like the ongoing activity (watching TV, family time, reading, etc.). There were no PM<sub>2.5</sub> daily NAAQs exceedances when at least one EWB assessment existed for any of the neighborhoods.

SI Fig. 1: Minneapolis-St. Paul city map with the study neighborhoods identified. The different shadings and lines represent household income and rail access, respectively. The blue stars are the locations of the Minnesota Pollution Control Agency (MPCA) air pollution monitoring sites that were used for low-cost sensor (LCS) evaluation and calibration.

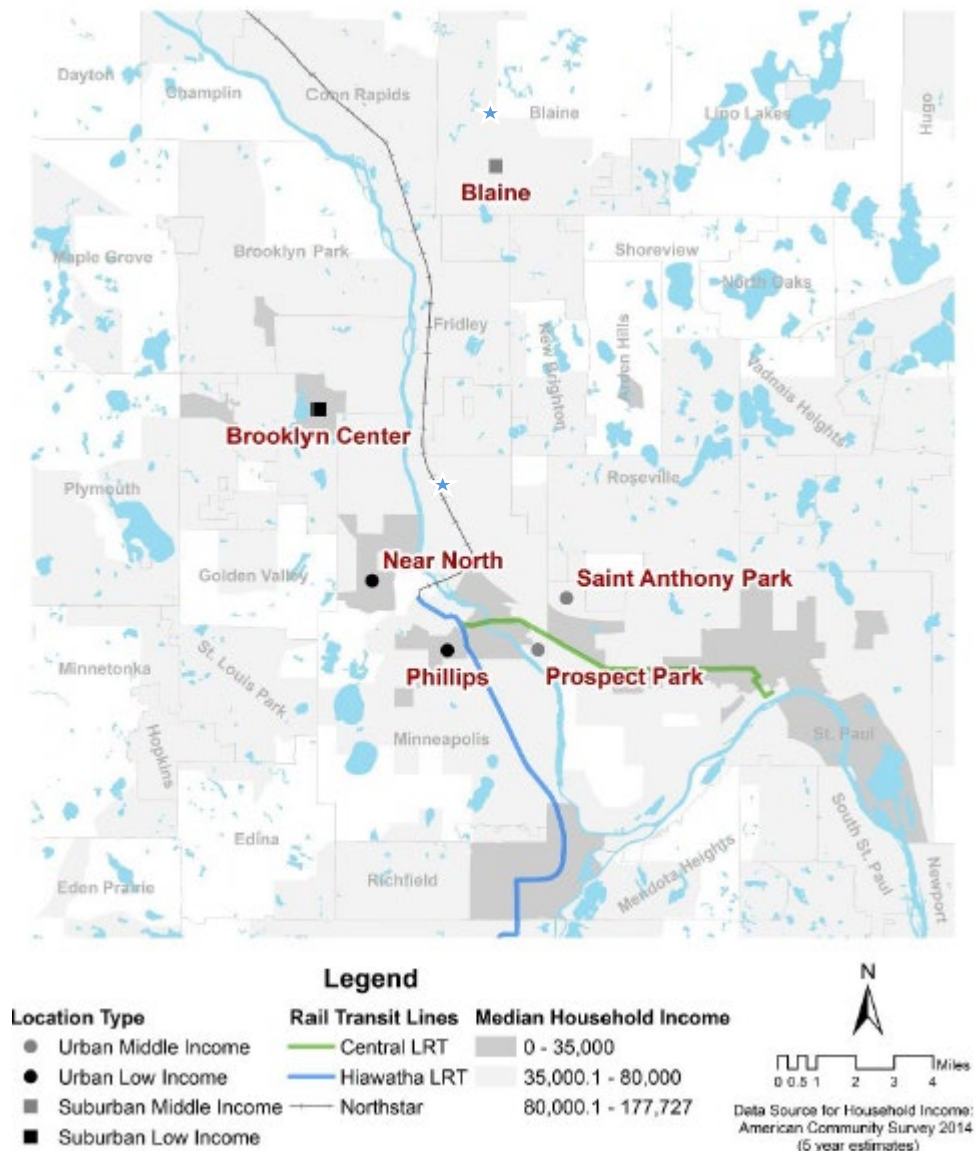

SI Fig. 2: Sample of the low-cost sensor set up (within the red circle) in St. Anthony Park. In each neighborhood, monitors were ziptied to fences or other stationary spots outside the house that were isolated and away from emission sources. Monitors were elevated to approximately the inhalation height in each neighborhood.

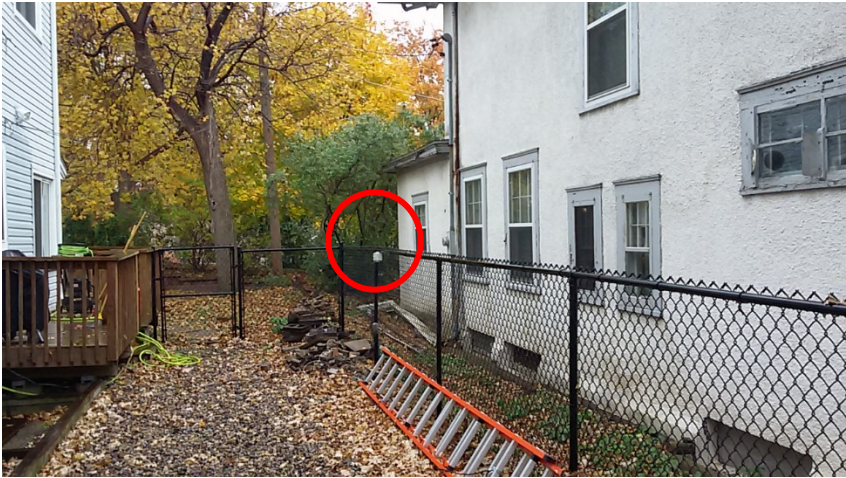

SI Fig. 3: Schematic of the Plantower PMS3003 (which measures  $PM_{10}$ ,  $PM_{2.5}$ , and  $PM_{1}$ ) as originally published in Kelly et al. (1). The figure is republished with permission from Kelly and Elsevier Publishing . The output waveform produced by the photodiode estimates mass concentration from particle size (pulse amplitude) and number concentration (pulse frequency)

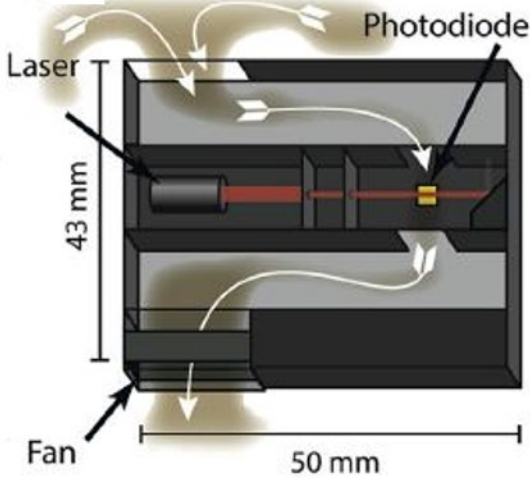

SI Fig. 4: Sample interface of Daynamica, the smartphone application used to assess well-being. Residents of the study neighborhoods responded to well-being surveys after completing activities throughout the day.

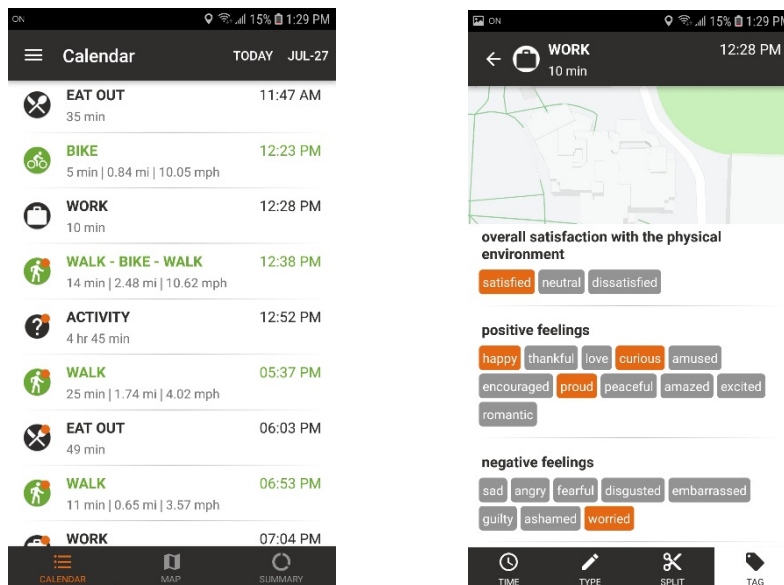

SI Fig. 5: Sample calibration results of the Plantower PMS 3003 sensor co-located with a Beta Attenuation Monitor (BAM) at a Minnesota Pollution Control Agency (MPCA) site (AQS Site ID# 27-053-0962). (a) Pre-calibration scatter: Comparison of 5 low-cost sensors (LCS) with BAM measurements. The best fit is a piecewise continuous fit. (b) Pre-calibration time series:  $PM_{2.5}$  time series where the thick blue line is the BAM measurement and the thin lines are the LCS measurements. (c) Piecewise correction without relative humidity correction: The adjusted Plantower results following a piecewise adjustment (i.e., a fit was determined, and values below the split point were given one linear calibration, and sensor concentrations' above the split point were given a different calibration). (d) Relative humidity correction method: RH vs.  $PM_{2.5}$  fit using Zheng, et al. (2). (e) Post-RH Correction scatter: Comparison of 5 LCS with BAM measurements following the RH correction. (f) Post-RH Correction Calibration time series.

a)

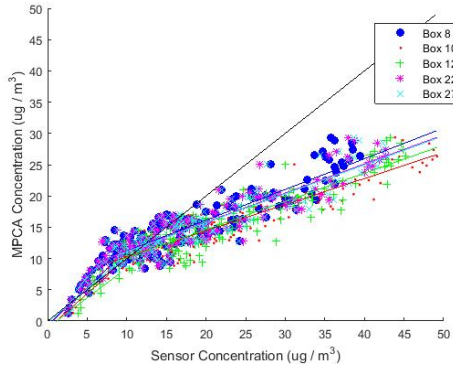

b)

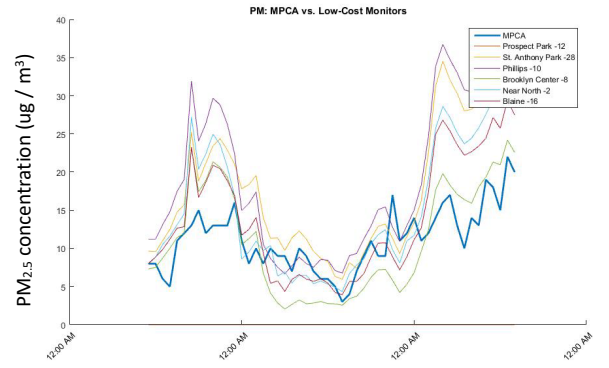

c)

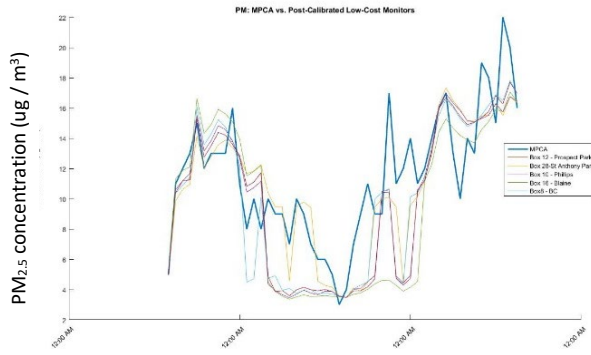

d)

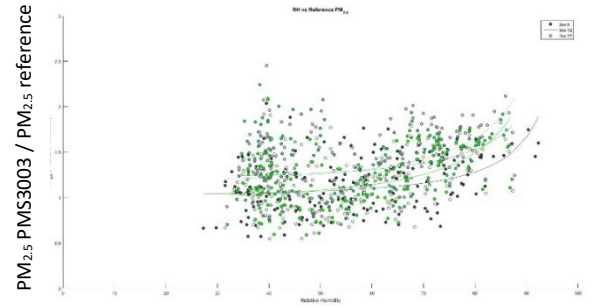

e)

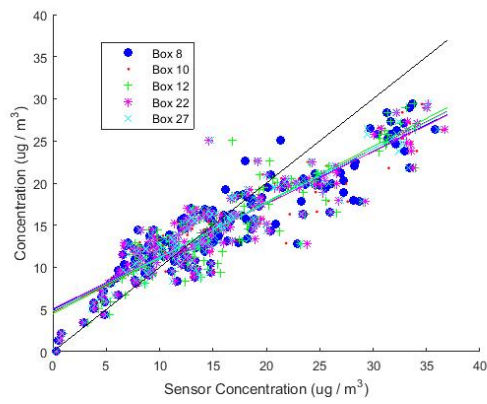

f)

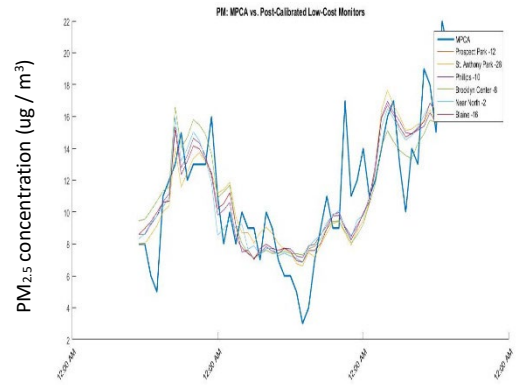

SI Fig. 6: Low-cost sensor raw and post-RH-corrected calibration time series in Minneapolis throughout the study period. The thicker lines represent low-cost sensor concentrations while the thin blue and orange lines are from two regulatory monitors (AQS Site IDs# 27-003-1002 & 27-053-0962) in the study domain: (a) Raw  $PM_{2.5}$  and (b) Calibrated  $PM_{2.5}$

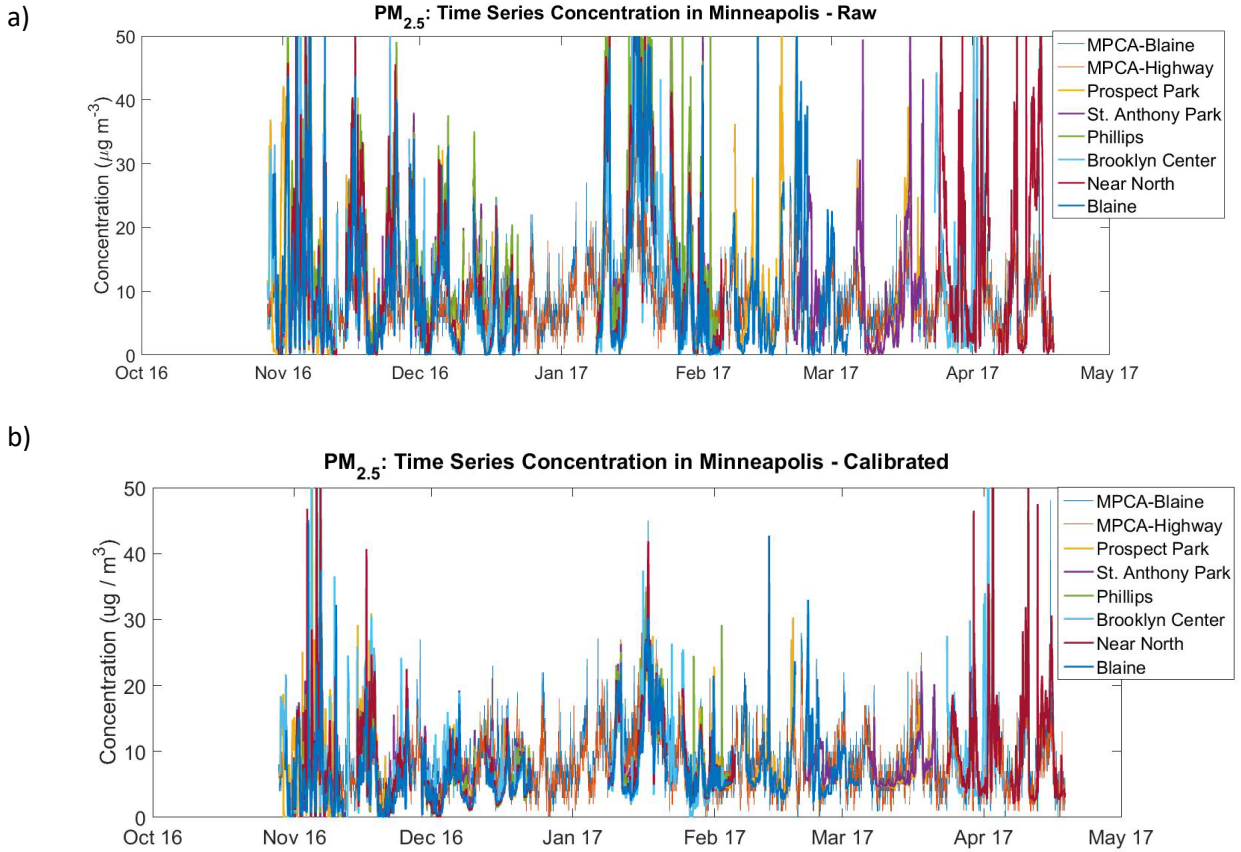

SI Fig. 7: Comparison of 1-hour neighborhood low-cost sensor  $PM_{2.5}$  measurements against regulatory site (MPCA-Blaine and MPCA-NRN) measurements

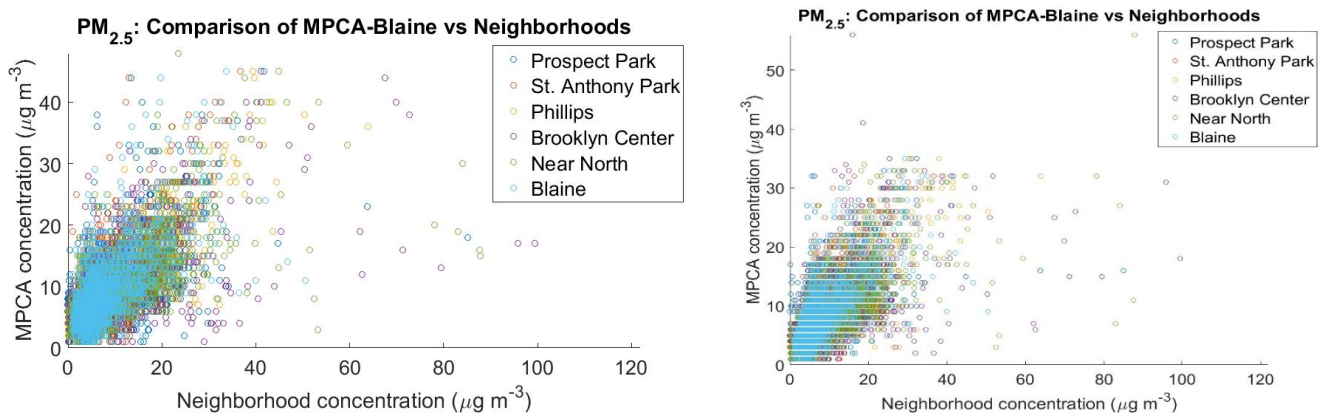



SI Fig. 8: Boxplots of the top 10% of pollution (low-cost sensor (LCS) PM<sub>2.5</sub> and R-Line simulated NO<sub>x</sub>) on each of the six emotional well-being (EWB) indicators in the six study neighborhoods. The left column is for LCS PM<sub>2.5</sub> responses, and the right column is R-Line simulated NO<sub>x</sub> home-based responses.

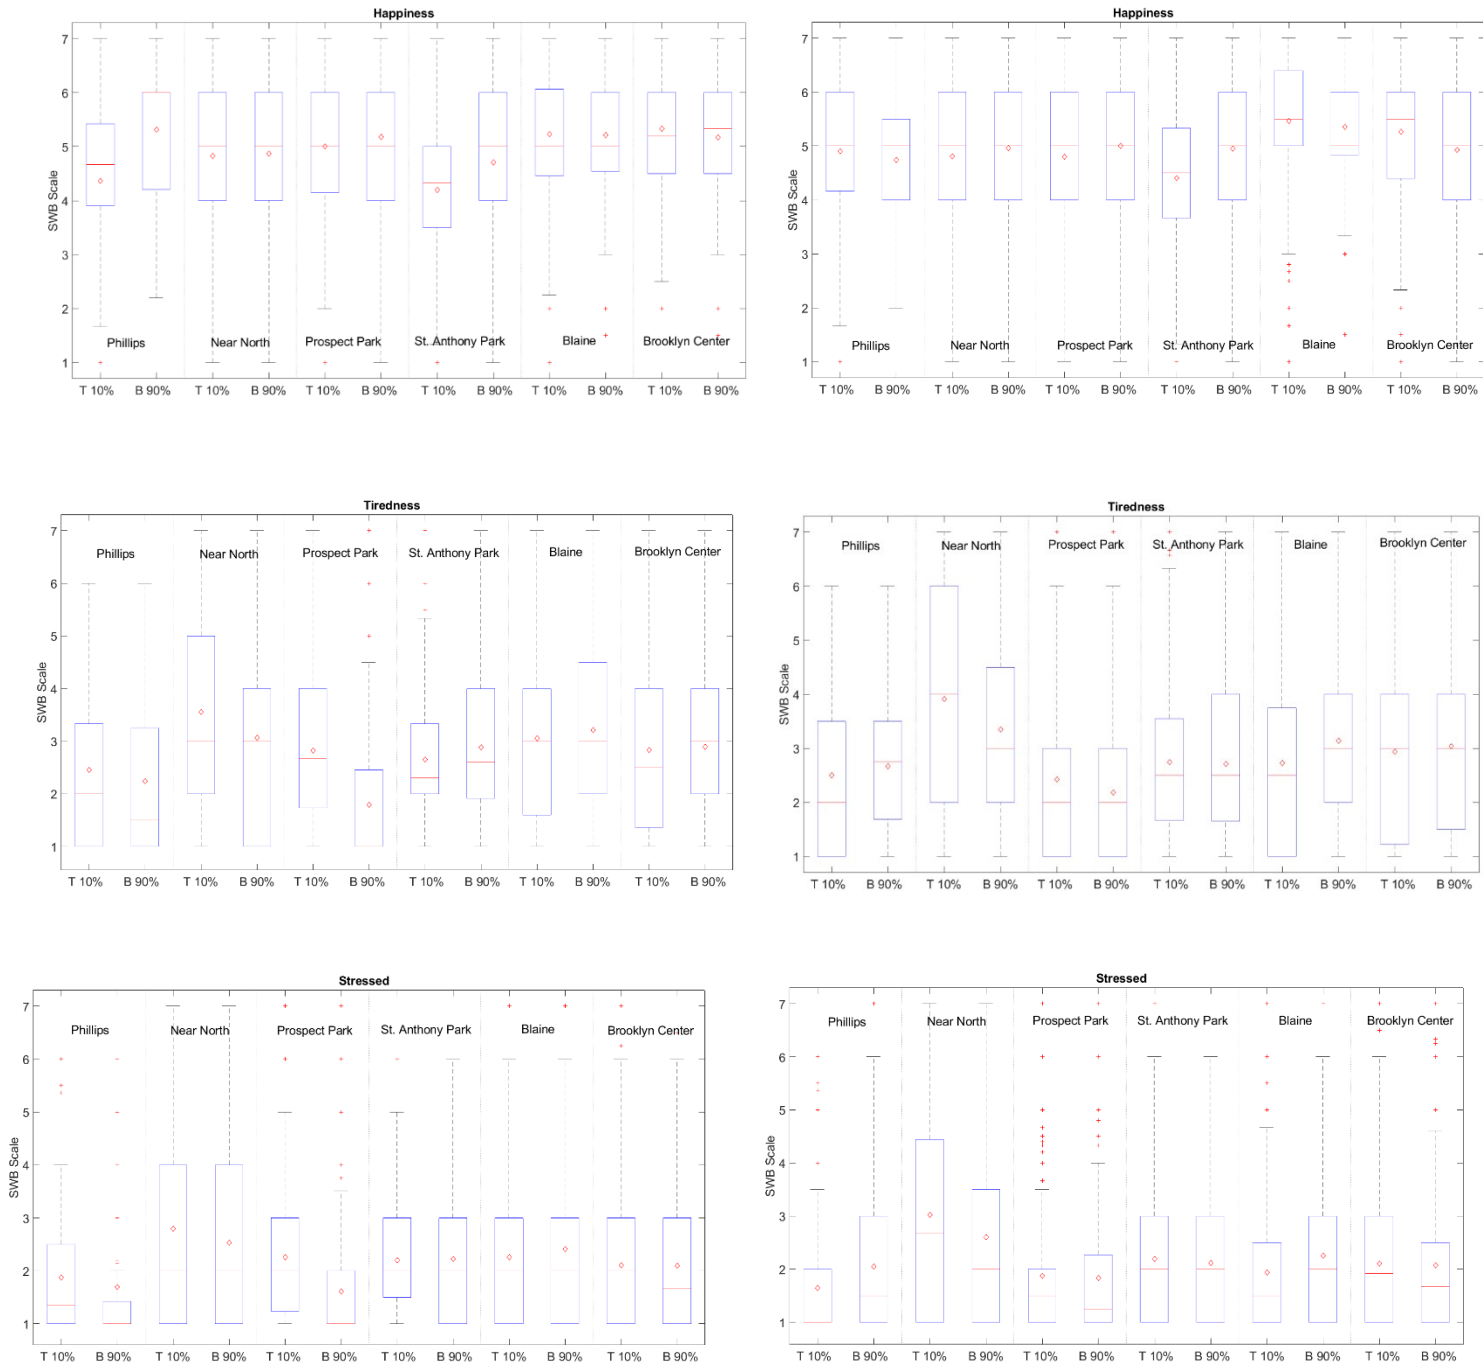

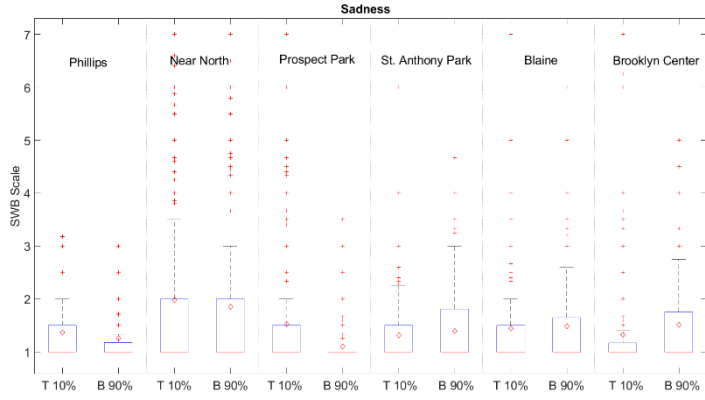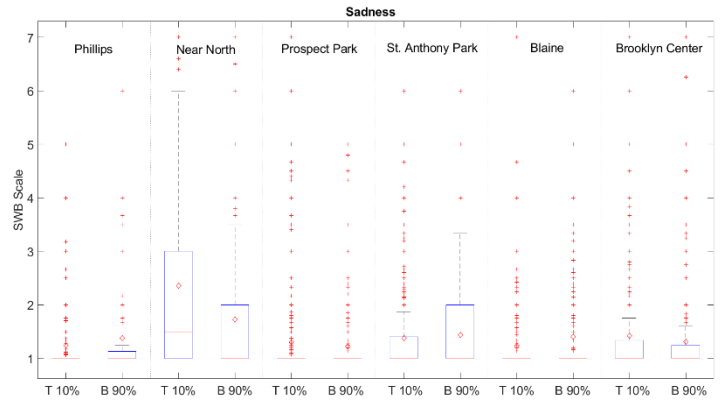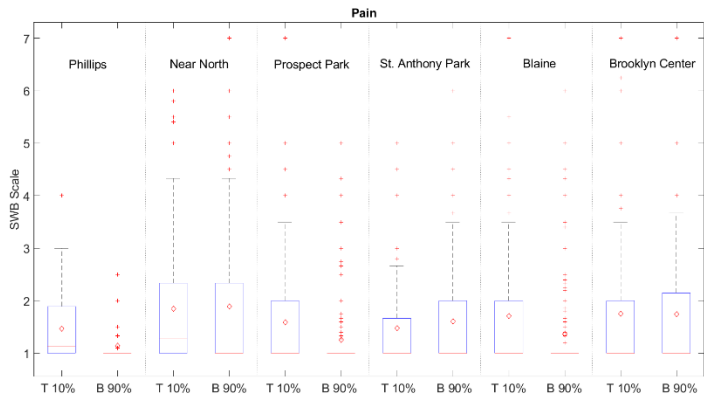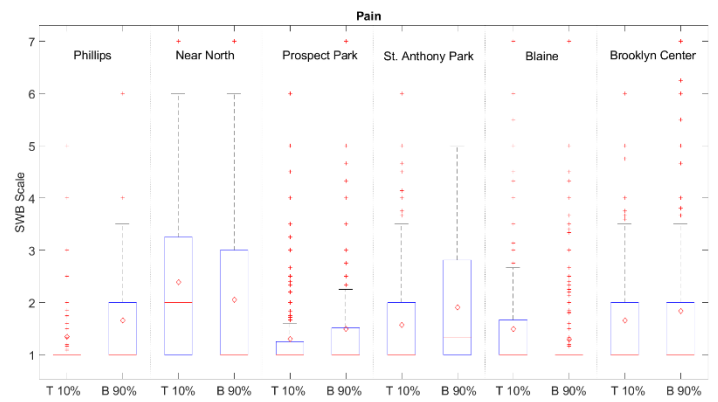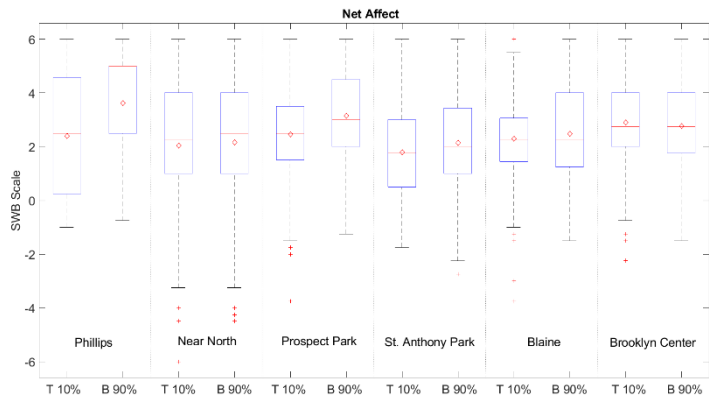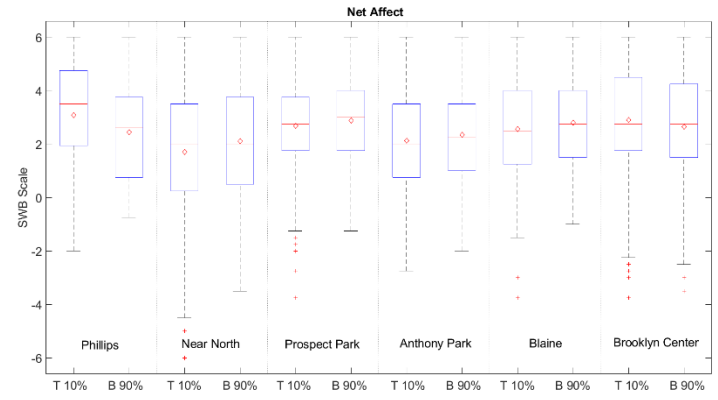

SI Fig. 9: Average R-Line simulated mobile source NO<sub>x</sub> impacts before correction during the study period

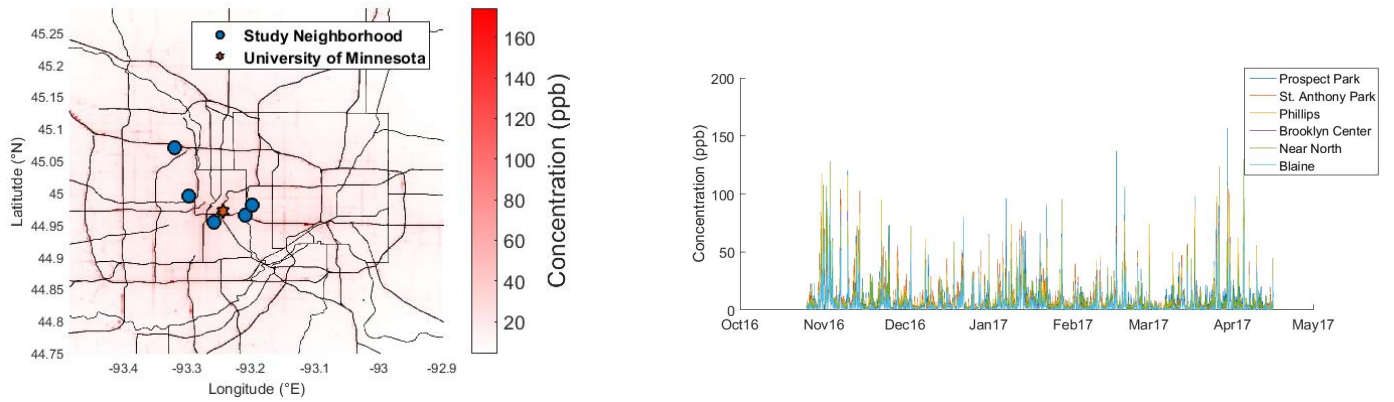

SI Fig. 10: Hourly R-Line simulated NO<sub>x</sub> concentrations (x-axis) against the true mobile source impact (Near Road minus background measurement). The slope of the regression is used to adjust the R-Line NO<sub>x</sub> outputs

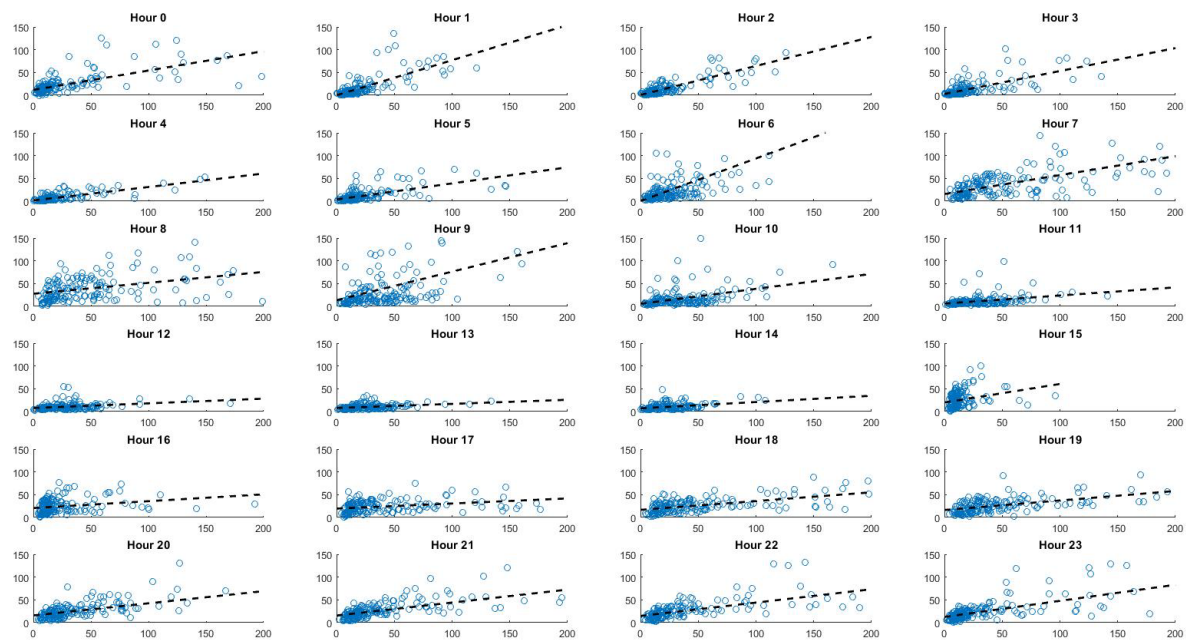

SI Fig. 11: Comparison of (a) R-Line initial simulated NO<sub>x</sub> and (b) R-Line following calibration simulated NO<sub>x</sub> against the estimated mobile-source impact at a Near-Road (Monitoring) Network (NRN) site (AQS Site ID# 27-053-0962) in Minneapolis. The mobile-source impact was estimated as the difference between the NRN site and a background NO<sub>x</sub> observation (AQS Site ID# 27-003-1002).

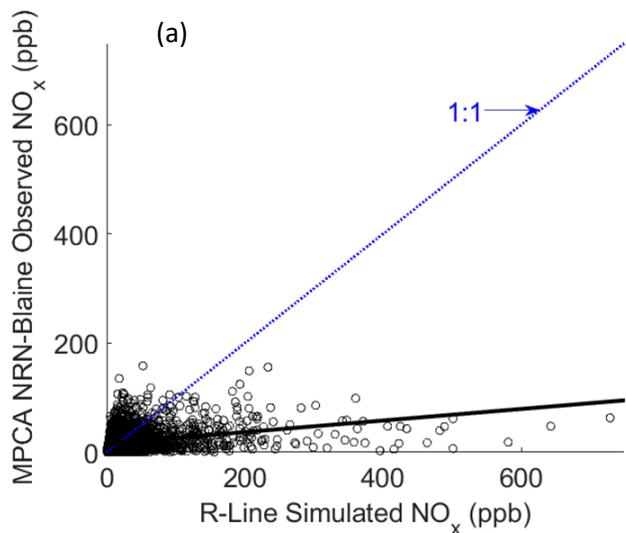

$$NO_{x,observed} = 0.11 * NO_{x,R-Line\ simulated} + 15.9$$

$$r^2 = 8.4 \times 10^{-2}$$

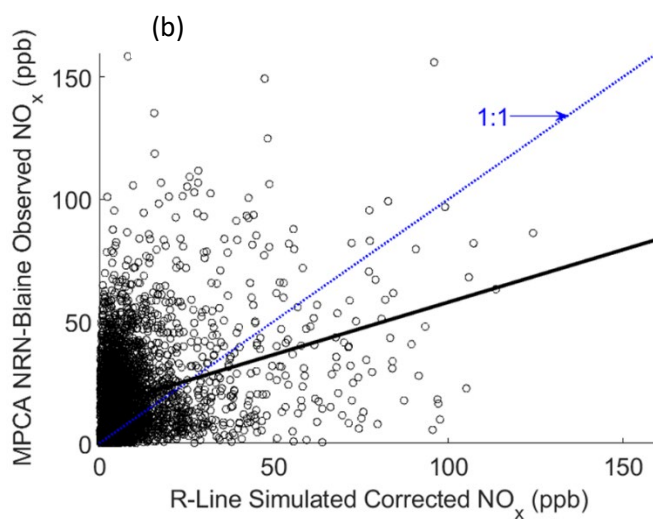

$$NO_{x,observed} = 0.43 * NO_{x,R-Line\ simulated} + 14.9$$

$$r^2 = 9.5 \times 10^{-2}$$

SI Table 1: Air Quality System (AQS) regulatory PM<sub>2.5</sub> and NO<sub>2</sub> monitors in the study domain. The asterisk (\*) next to the site name indicates it is not a source-oriented site.

| Site name                | AQS Site ID# | Pollutants measured                 | Additional details            |
|--------------------------|--------------|-------------------------------------|-------------------------------|
| Blaine-Anoka Airport     | 27-003-1002  | PM <sub>2.5</sub> , NO <sub>2</sub> | Housed at airport             |
| Harding High School*     | 27-123-0871  | PM <sub>2.5</sub>                   | Urban neighborhood            |
| Ramsey Health Center     | 27-123-0868  | PM <sub>2.5</sub>                   | Very near highway             |
| Andersen School*         | 27-053-0963  | PM <sub>2.5</sub>                   | Urban neighborhood            |
| St. Louis Park City Hall | 27-053-2006  | PM <sub>2.5</sub>                   | Commercial, high-volume roads |
| Near-Road I-35/I-94      | 27-053-0962  | PM <sub>2.5</sub> , NO <sub>2</sub> | Near-road site                |
| Apple Valley*            | 27-037-0470  | PM <sub>2.5</sub>                   | Suburban neighborhood         |
| B.F. Pearson School*     | 27-139-0505  | PM <sub>2.5</sub>                   | Suburban neighborhood         |
| Near-Road I-35           | 27-037-0480  | PM <sub>2.5</sub> , NO <sub>2</sub> | Near-Road I-35                |

SI Table 2: Summary of LCS regressions from the co-location approach to calibrate LCS PM<sub>2.5</sub> with a Beta Attenuation Monitor (BAM) at the NRN site (AQS Site ID# 27-053-0962). A linear fit was used to correct the raw PM<sub>2.5</sub> data following an RH-correction as outlined by Zheng et al. (2). The asterisk (\*) indicates that the sensor in the neighborhood changed to a different, but not necessarily new sensor that week. The “x” in the regression equation is the RH-corrected LCS PM<sub>2.5</sub> observation.

| Calibration No. | Dates             | NRN Average (Range) PM <sub>2.5</sub> | r <sup>2</sup> | Prospect Park regression |
|-----------------|-------------------|---------------------------------------|----------------|--------------------------|
| 1               | 11/11/16-11/13/16 | 8.1 (1-24)                            | 0.83           | 1.3*x-0.99               |
| 2               | 11/25 – 11/27     | 10.9 (4-27)                           | 0.76           | 1.1*x-0.05               |
| 4               | 12/21-12/23       | 9.0 (2-22)                            | 0.81           | 0.64*x+3.18              |
| 5               | 1/20-1/23         | 10.0 (4-21)                           | 0.48           | 0.87*x+1.85              |
| 6               | 2/3-2/6           | 10.1 (3-22)                           | 0.81           | 0.67*x+4.4               |
| 7               | 2/17-2/19         | 9.7 (-1-28)                           | 0.85           | 0.65*x+1.7               |
| 8               | 3/3-3/5           | 9.9 (3-17)                            | 0.42           | 0.52*x+5.0               |
| 10              | 4/3-4/5           | 6.1 (-1-13)                           | N/A            |                          |
| 11              | 4/17-4/19         | 5.8 (0-13)                            | N/A            |                          |

| St. Anthony Park |             | Phillips       |            | Brooklyn Center |            | Near North     |            | Blaine         |             |
|------------------|-------------|----------------|------------|-----------------|------------|----------------|------------|----------------|-------------|
| r <sup>2</sup>   | regression  | r <sup>2</sup> | regression | r <sup>2</sup>  | regression | r <sup>2</sup> | regression | r <sup>2</sup> | regression  |
| 0.79             | 1.6*x-2.5   | 0.80           | 1.6*x-2.4  | 0.83            | 1.5*x-1.8  | 0.83           | 1.5*x-1.81 | N/A            |             |
| 0.59             | 0.99*x-0.90 | 0.74           | 1.2*x-0.90 | N/A             |            | 0.76           | 1.1*x-0.77 | 0.72           | 1.1*x-0.06  |
| 0.83             | 0.56*x+3.59 | 0.82           | 0.68*x+2.8 | 0.80            | 0.52*x+4.0 | 0.80           | 0.61*x+3.4 | 0.81           | 0.56*x+3.7  |
| 0.61             | 1.0*x+0.56  | 0.58           | 1.1*x-0.20 | 0.72            | 1.2*x-1.8  | 0.54           | 0.98*x+0.8 | 0.58           | 0.97*x+0.78 |
| 0.58             | 0.50*x+5.0  | 0.60           | 0.49*x+5.1 | 0.60            | 0.42+6.5   | 0.69           | 0.53*x+5.2 | 0.67           | 0.54*x+5.2  |
| N/A              | N/A         | N/A            |            | N/A             |            | N/A            |            | 0.82           | 0.62*x+1.9  |
| 0.42             | 0.54*x+4.8  | N/A            |            | N/A             |            | N/A            |            | 0.44           | 0.51*x+5.0  |
| N/A              |             | N/A            |            | 0.63            | 0.75*x+2.1 | 0.65           | 0.79*x+2.0 | N/A            | N/A         |
| N/A              |             | N/A            |            | 0.56            | 0.48*x+2.9 | 0.58           | 0.49*x+2.8 | N/A            | N/A         |

SI Table 3: Summary statistics of the comparison between the neighborhood low-cost sensor (LCS) PM<sub>2.5</sub> measurements against regulatory site measurements for the entire study period. The asterisk (\*) denotes the location of the closest neighborhood to the regulatory site

|                  | Near Road Network: I-35/I-94 |       |           | Blaine         |       |           |
|------------------|------------------------------|-------|-----------|----------------|-------|-----------|
|                  | R <sup>2</sup>               | Slope | Intercept | R <sup>2</sup> | Slope | Intercept |
| Prospect Park    | 0.29                         | 0.49  | 4.5       | 0.30           | 0.46  | 4.2       |
| St. Anthony Park | 0.34                         | 0.69  | 2.9       | 0.44           | 0.68  | 2.4       |
| Phillips         | 0.61*                        | 0.62  | 3.7       | 0.58           | 0.57  | 3.5       |
| Brooklyn Center  | 0.35                         | 0.41  | 5.5       | 0.33           | 0.38  | 5.0       |
| Near North       | 0.45                         | 0.45  | 4.8       | 0.47           | 0.45  | 4.1       |
| Blaine           | 0.29                         | 0.62  | 4.2       | 0.49*          | 0.63  | 3.2       |

SI Table 4: Study-average observed PM<sub>2.5</sub> concentrations (95% confidence intervals) from low-cost sensors and simulated mobile-source NO<sub>x</sub> concentrations (95% Confidence Interval) modeled in R-Line.

|                  | Low-cost sensor PM <sub>2.5</sub> (µg m <sup>-3</sup> ) | R-Line NO <sub>x</sub> (ppb) |
|------------------|---------------------------------------------------------|------------------------------|
| Prospect Park    | 7.8 (7.5-8.0)                                           | 8.2 (7.8-8.6)                |
| St. Anthony Park | 7.4 (7.2-7.6)                                           | 8.0 (7.7-8.4)                |
| Phillips         | 7.5 (7.2-7.8)                                           | 8.2 (7.8-8.6)                |
| Brooklyn Center  | 8.0 (7.7-8.4)                                           | 6.4 (6.1-6.7)                |
| Near North       | 8.2 (7.9 -8.5)                                          | 7.4 (7.1-7.7)                |
| Blaine           | 6.7 (6.4-6.9)                                           | 3.8 (3.6-4.0)                |

SI Table 5: The concentration cutoff between the top 10% of PM<sub>2.5</sub>/mobile-source NO<sub>x</sub> hours and the 90% cleanest hours in each neighborhood.

|                                                | Phillips | Near North | Prospect Park | St. Anthony Park | Blaine | Brooklyn Center |
|------------------------------------------------|----------|------------|---------------|------------------|--------|-----------------|
| NO <sub>x</sub> cutoff (ppb)                   | 10.5     | 17.4       | 20.1          | 17.5             | 7.2    | 11.5            |
| PM <sub>2.5</sub> cutoff (µg m <sup>-3</sup> ) | 18.4     | 18.5       | 14.1          | 13.7             | 11.4   | 12.6            |

SI Table 6: Hourly regression results for the R-Line NO<sub>x</sub> corrections. R-Line results were biased high, so the initial outputted model results were corrected based on hour.

| Hour | regression                                                        | r <sup>2</sup>       |
|------|-------------------------------------------------------------------|----------------------|
| 0    | [NOx] <sub>corrected</sub> = 0.42 x [NOx] <sub>R-Line</sub> + 12  | 0.42                 |
| 1    | [NOx] <sub>corrected</sub> = 0.72 x [NOx] <sub>R-Line</sub> + 9.3 | 0.45                 |
| 2    | [NOx] <sub>corrected</sub> = 1.1 x [NOx] <sub>R-Line</sub> + 5.1  | 0.33                 |
| 3    | [NOx] <sub>corrected</sub> = 0.95 x [NOx] <sub>R-Line</sub> + 7.8 | 0                    |
| 4    | [NOx] <sub>corrected</sub> = 2.0 x [NOx] <sub>R-Line</sub> + 4.7  | 0                    |
| 5    | [NOx] <sub>corrected</sub> = 1.1 x [NOx] <sub>R-Line</sub> + 9.1  | 0                    |
| 6    | [NOx] <sub>corrected</sub> = 0.41 x [NOx] <sub>R-Line</sub> + 18  | 0.44                 |
| 7    | [NOx] <sub>corrected</sub> = 0.23 x [NOx] <sub>R-Line</sub> + 24  | 0.19                 |
| 8    | [NOx] <sub>corrected</sub> = 0.16 x [NOx] <sub>R-Line</sub> + 32  | 7.3x10 <sup>-2</sup> |
| 9    | [NOx] <sub>corrected</sub> = 0.25 x [NOx] <sub>R-Line</sub> + 33  | 0                    |
| 10   | [NOx] <sub>corrected</sub> = 0.11 x [NOx] <sub>R-Line</sub> + 38  | 0                    |
| 11   | [NOx] <sub>corrected</sub> = 0.54 x [NOx] <sub>R-Line</sub> + 28  | 0                    |
| 12   | [NOx] <sub>corrected</sub> = 0.86 x [NOx] <sub>R-Line</sub> + 21  | 0                    |
| 13   | [NOx] <sub>corrected</sub> = 1.1 x [NOx] <sub>R-Line</sub> + 16   | 0                    |
| 14   | [NOx] <sub>corrected</sub> = 0.92 x [NOx] <sub>R-Line</sub> + 17  | 0                    |
| 15   | [NOx] <sub>corrected</sub> = 0.36 x [NOx] <sub>R-Line</sub> + 23  | 0                    |
| 16   | [NOx] <sub>corrected</sub> = 0.05 x [NOx] <sub>R-Line</sub> + 22  | 2.1x10 <sup>-2</sup> |
| 17   | [NOx] <sub>corrected</sub> = 0.07 x [NOx] <sub>R-Line</sub> + 21  | 0                    |
| 18   | [NOx] <sub>corrected</sub> = 0.09 x [NOx] <sub>R-Line</sub> + 21  | 0                    |
| 19   | [NOx] <sub>corrected</sub> = 0.17 x [NOx] <sub>R-Line</sub> + 18  | 9.0x10 <sup>-2</sup> |
| 20   | [NOx] <sub>corrected</sub> = 0.24 x [NOx] <sub>R-Line</sub> + 38  | 0                    |
| 21   | [NOx] <sub>corrected</sub> = 0.31 x [NOx] <sub>R-Line</sub> + 28  | 0                    |
| 22   | [NOx] <sub>corrected</sub> = 0.24 x [NOx] <sub>R-Line</sub> + 28  | 0                    |
| 23   | [NOx] <sub>corrected</sub> = 0.35 x [NOx] <sub>R-Line</sub> + 13  | 0.35                 |

SI Table 7: Hourly percent differences comparing R-Line initial and post-calibrated mobile-source NO<sub>x</sub> simulations extracted at the Near-road (Monitoring) Network (NRN) site (AQS Site ID# 27-053-0962) against the true mobile source impact assessed at the NRN site. The mobile-source impact was estimated as the difference between the NRN site and a background NO<sub>x</sub> observation (AQS Site ID# 27-003-1002). The negative values indicates the model result is biased low relative to the NRN observation.

| Hour | Initial simulation percent difference (%) | Post-calibration percent difference (%) |
|------|-------------------------------------------|-----------------------------------------|
| 0    | -33                                       | 65                                      |
| 1    | -36                                       | -13                                     |
| 2    | -63                                       | 4.8                                     |
| 3    | -48                                       | 14                                      |
| 4    | -2.4                                      | -29                                     |
| 5    | 66                                        | -3.2                                    |
| 6    | 51                                        | -60.4                                   |
| 7    | -4.3                                      | -10                                     |



|    |      |      |
|----|------|------|
| 8  | -44  | -60  |
| 9  | -63  | -30  |
| 10 | -48  | -56  |
| 11 | -2.4 | -10  |
| 12 | -44  | -2.2 |
| 13 | -48  | -14  |
| 14 | 22   | -2.4 |
| 15 | 94   | -18  |
| 16 | 123  | -67  |
| 17 | 105  | -23  |
| 18 | 58   | -35  |
| 19 | 53   | -19  |
| 20 | 55   | -8.2 |
| 21 | 43   | -2.7 |
| 22 | 13   | -3.8 |
| 23 | -23  | 18   |

SI Table 8: Summary of demographic and economic status of the participants for the emotional well-being (EWB) assessments in Minneapolis neighborhoods

| Variable                   | Total      | Phillips  | Near North | Prospect Park | St. Anthony Park | Blaine    | Brooklyn Center |
|----------------------------|------------|-----------|------------|---------------|------------------|-----------|-----------------|
| Female                     | 268        | 48        | 46         | 43            | 55               | 37        | 39              |
| Living with Spouse/partner | 238        | 34        | 27         | 48            | 56               | 40        | 33              |
| Age (median)               | 52         | 44        | 55         | 57            | 58               | 43        | 54              |
| Employed Full Time         | 163        | 17        | 18         | 30            | 33               | 30        | 35              |
| Disabled                   | 79         | 20        | 20         | 8             | 10               | 8         | 13              |
| Children Under 18 Present  | 122        | 30        | 25         | 11            | 20               | 21        | 15              |
| White                      | 309        | 42        | 32         | 65            | 74               | 48        | 48              |
| Asian                      | 15         | 4         | 1          | 2             | 3                | 4         | 1               |
| Black                      | 43         | 11        | 27         | 0             | 0                | 1         | 4               |
| American Indian            | 9          | 9         | 0          | 0             | 0                | 0         | 0               |
| Multiple                   | 21         | 9         | 2          | 3             | 1                | 2         | 4               |
| Low income (< 25K)         | 83         | 31        | 24         | 9             | 9                | 3         | 7               |
| Med income (25-75K)        | 138        | 25        | 28         | 20            | 19               | 17        | 29              |
| High income (75K +)        | 176        | 18        | 10         | 41            | 51               | 35        | 21              |
| <b>Total Sample Number</b> | <b>398</b> | <b>75</b> | <b>62</b>  | <b>70</b>     | <b>79</b>        | <b>55</b> | <b>57</b>       |

SI Table 9: t-statistics on the relationship between low-cost sensor (LCS) PM<sub>2.5</sub> and R-Line mobile source simulated NO<sub>x</sub> against emotional well-being (EWB) assessments in the study neighborhoods. None of the regressions are statistically significant at  $\alpha = 0.05$ .

|            | LCS PM <sub>2.5</sub> | R-Line NO <sub>x</sub> |
|------------|-----------------------|------------------------|
| Happiness  | 0.87                  | 2.1                    |
| Tiredness  | 0.44                  | 0.48                   |
| Stressed   | 0.95                  | 0.13                   |
| Sadness    | 2.3                   | 0.41                   |
| Pain       | 1.0                   | 0.49                   |
| Net affect | 0.58                  | 0.75                   |

SI Table 10: NO<sub>x</sub> NAAQS exceedances (NO<sub>2</sub> hourly standard) in the neighborhoods for hours when concurrent emotional well-being (EWB) assessments existed.

| Neighborhood  | Date and time           | R-Line simulated NO <sub>x</sub> (ppb) |
|---------------|-------------------------|----------------------------------------|
| Near North    | Nov. 3, 2016 (8:00 pm)  | 115.1                                  |
| Prospect Park | Nov. 11, 2016 (7:00 pm) | 108.1                                  |
| Prospect Park | Feb. 19, 2017 (2:00 am) | 136.6                                  |
| Prospect Park | Feb. 21, 2017 (1:00 am) | 106.4                                  |

SI Table 11: Average difference between emotional well-being (EWB) indicators for hours (including a two-day lag) when the R-Line simulated mobile-source NO<sub>x</sub> concentration exceeded the hourly NO<sub>2</sub> NAAQS (100 ppm). Positive values indicate the EWB where NAAQS exceedance occurrences were higher than the non-NAAQs exceedances (i.e., a positive value means the EWB outcome was higher in the NAAQs exceedance days). The asterisk (\*) indicates the difference is statistically significant ( $\alpha=0.05$ ).

| EWB indicator     | Near North | Prospect Park         |
|-------------------|------------|-----------------------|
| Happiness         | 1.2*       | -0.83*                |
| Tiredness         | -1.1*      | 0.30                  |
| Stress            | -1.4*      | 5.4x10 <sup>-2</sup>  |
| Sadness           | -0.98*     | -7.6x10 <sup>-2</sup> |
| Pain              | -0.97*     | -2.4x10 <sup>-2</sup> |
| <i>Net affect</i> | 2.5*       | -0.67*                |

## REFERENCES

1. Kelly KE, *et al.* (2017) Ambient and laboratory evaluation of a low-cost particulate matter sensor. *Environmental Pollution* 221:491-500.
2. Zheng T, Bergin, M. H., Johnson, K. K., Tripathi, S. N., Shirodkar, S., Landis, M. S., Sutaria, R., and Carlson, D. E. (2018) Field evaluation of low-cost particulate matter sensors in high and low concentration environments. *Atmos. Meas. Tech. Discuss.*
